# Supplementary material for: A gel-based PCR method to differentiate sheeppox virus field isolates from vaccine strains
Source: PubMed Central journal article supplement (PMC5879731; doi:10.1186/s12985-018-0969-8), 2018-04-02

MM a b c 23 24 25 26 27 28 29 30 31 32 33

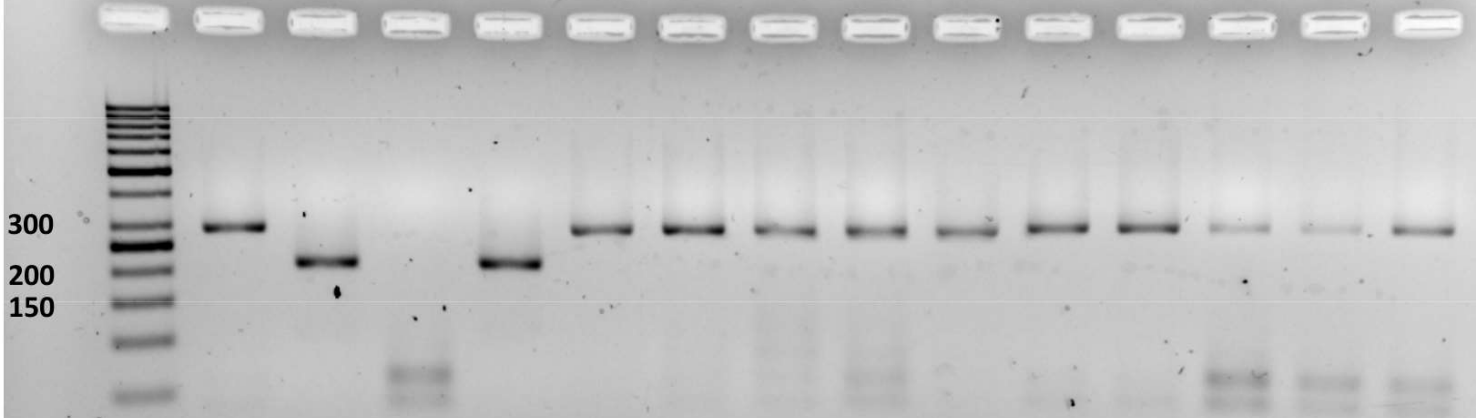

MM 34 35 36 37 38 39 40 41 42 43 44 45 46

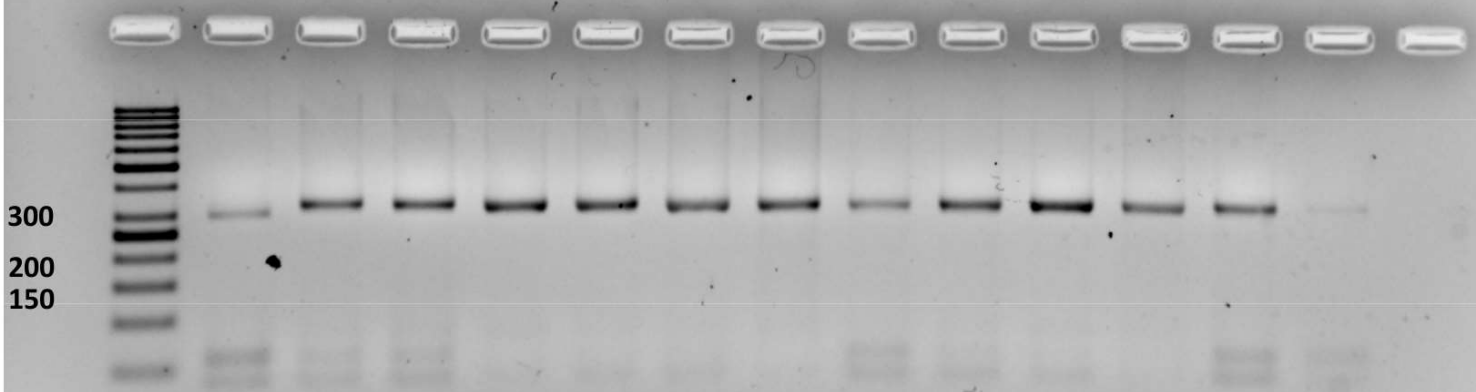

Supplement: 12985_2018_969_MOESM2_ESM.pdf [file 12985_2018_969_MOESM2_ESM.pdf]
