# Supplementary material for: A gel-based PCR method to differentiate sheeppox virus field isolates from vaccine strains
Source: Springer Nature journal article supplement (doi:10.1186/s12985-018-0969-8), 2018-04-02

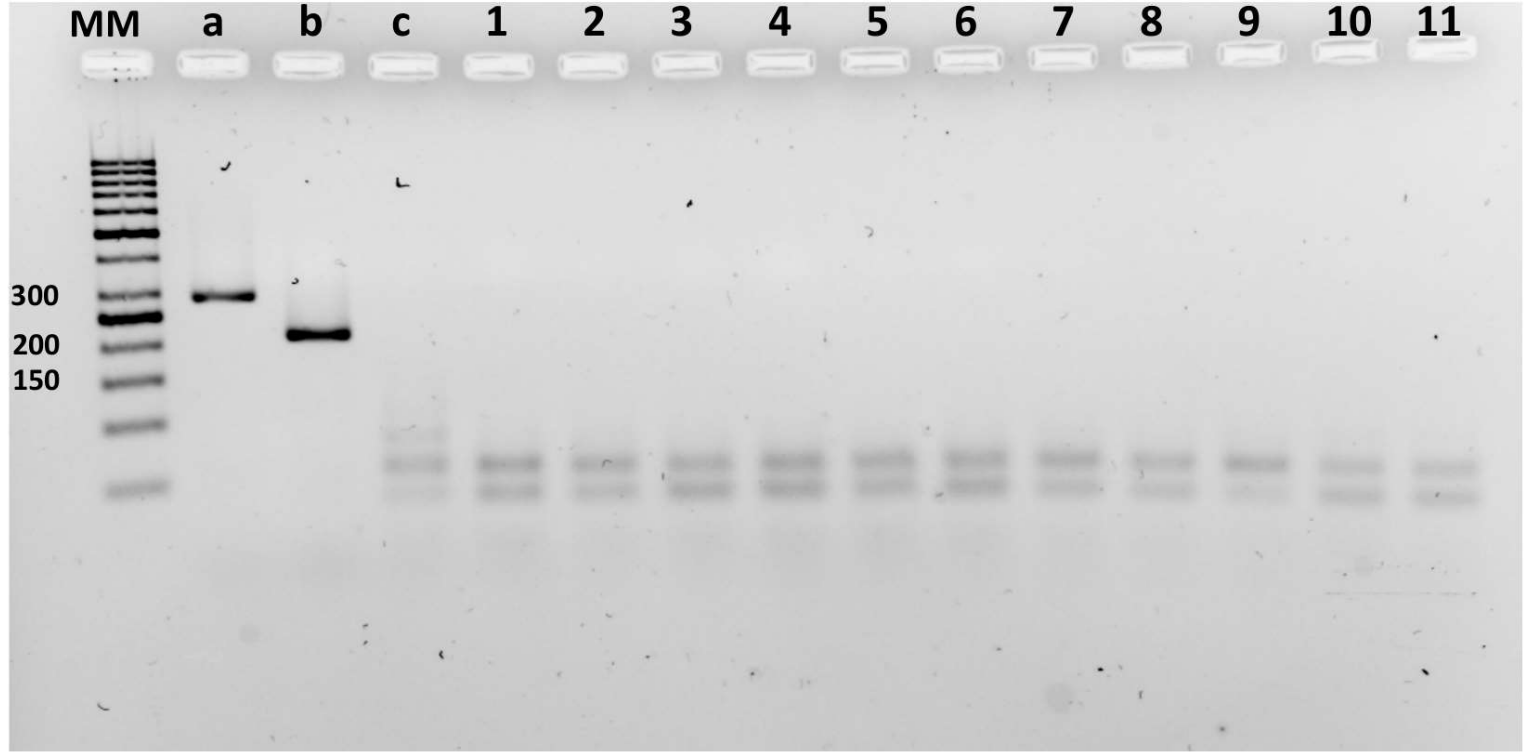

Supplement: MOESM4 [file 15583066]
